# Supplementary material for: The Effect of Tuberculosis Treatment at Combination Antiretroviral Therapy Initiation on Subsequent Mortality: A Systematic Review and Meta-Analysis
Source: PubMed Central journal article supplement (PMC3797056; doi:10.1371/journal.pone.0078073), 2013-10-15
Supplement: pone.0078073.s001.pdf [file pone.0078073.s001.pdf]

**Table S1. Combination antiretroviral therapy regimens utilized in each study**

| <b>Study</b>             | <b>cART regimen(s)</b>                                                                                                                                   |
|--------------------------|----------------------------------------------------------------------------------------------------------------------------------------------------------|
| Bassett 2012             | “standard ART regimens as per contemporaneous South African guidelines”                                                                                  |
| Bera 2009                | 96.4% EFV-based cART<br>4.2% NVP-based cART<br>2.9% ZDV-based cART<br>97.4% d4T-based cART                                                               |
| Bhowmik 2012             | First-line: EFV/NVP + ZDV/d4T + 3TC                                                                                                                      |
| Boulle 2008 (a)          | NVP + 2 NRTIs                                                                                                                                            |
| Boulle 2008 (b)          | EFV + 2 NRTIs                                                                                                                                            |
| Boulle 2010 (a,b)        | 8.8% EFV + ZDV + 3TC<br>8.4% NVP + ZDV + 3TC<br>43.6% EFV + d4T + 3TC<br>38.5% NVP + d4T + 3TC<br>0.8% other                                             |
| Chu 2011                 | Not specified                                                                                                                                            |
| Dao 2011                 | First-line: EFV/NVP + ZDV/d4T + 3TC                                                                                                                      |
| DeSilva 2009             | Most patients on first-line regimens (most common: NVP + d4T + 3TC)<br>10 patients received combined lopinavir/ritonavir as part of their regimen        |
| Dronda 2011              | Not specified                                                                                                                                            |
| Gupta 2013               | “predominantly EFV-based cART”                                                                                                                           |
| Greig 2012               | Not specified                                                                                                                                            |
| Lartey 2011              | 600 mg EFV + 400/300mg didanosine + 300 mg 3TC once daily                                                                                                |
| Liechty 2007             | First-line: EFV/NVP + d4T + 3TC                                                                                                                          |
| Makombe 2007 (a,b)       | First-line: NVP + d4T + 3TC                                                                                                                              |
| Manosuthi 2010           | NVP + d4T + 3TC<br>d4T switched to tenofovir or ZDV if d4T-related adverse events developed                                                              |
| Mugusi 2012 (a,b)        | With prevalent TB: 50.7% EFV + d4T + 3TC, 49.3% EFV + ZDV + 3TC<br>Without prevalent TB: 16.9% EFV + d4T + 3TC, 83.1% EFV + ZDV + 3TC                    |
| Mutevedzi 2011 (a,b,c,d) | First-line: EFV/NVP + d4T + 3TC                                                                                                                          |
| Nguyen 2011              | Not specified                                                                                                                                            |
| Stringer 2006 (a,b)      | First-line: NVP + ZDV/d4T + 3TC<br>In patients receiving acute-phase TB therapy with CD4 cell count <50 cells/μL: EFV-based cART                         |
| Westreich 2012 (a,b)     | With prevalent TB: 95.2% EFV-based cART, 3.0% NVP-based cART, 1.8% other<br>Without prevalent TB: 79.5% EFV-based cART, 9.5% NVP-based cART, 11.1% other |
| Zachariah 2006           | 93.7% fixed dose NVP + d4T + 3TC<br>4.4% EFV + d4T + 3TC<br>1.3% NVP + ZDV + 3TC<br>0.3% EFV + ZDV + 3TC<br>0.3% ZDV + didanosine + nelfinavir           |
| Zachariah 2009           | 99.8% NVP + d4T + 3TC<br>0.2% NVP + ZDV + 3TC                                                                                                            |

Abbreviations: 3TC, lamivudine; ART, antiretroviral therapy; cART, combination antiretroviral therapy; d4T, stavudine; EFV, efavirenz; NRTI, nucleos(t)ide reverse-transcriptase inhibitor; NVP, nevirapine; TB, tuberculosis; ZDV, zidovudine
