# Supplementary material for: The Effect of Tuberculosis Treatment at Combination Antiretroviral Therapy Initiation on Subsequent Mortality: A Systematic Review and Meta-Analysis
Source: PubMed Central journal article supplement (PMC3797056; doi:10.1371/journal.pone.0078073), 2013-10-15
Supplement: pone.0078073.s002.pdf [file pone.0078073.s002.pdf]

**Table S2. Types of TB included, by study**

| <b>Study</b>             | <b>Types of TB included</b>                                                                                                                        |
|--------------------------|----------------------------------------------------------------------------------------------------------------------------------------------------|
| Bassett 2012             | Newly diagnosed by sputum culture at cART enrollment or previously diagnosed and currently on treatment                                            |
| Bera 2009                | Concurrently on TB treatment at cART initiation                                                                                                    |
| Bhowmik 2012             | Concurrently on TB treatment at cART initiation                                                                                                    |
| Boulle 2008 (a)          | Concurrent TB treatment at cART initiation and for $\geq 14$ days post cART initiation. TB diagnosed by microscopy, culture or clinical algorithm. |
| Boulle 2008 (b)          | Concurrent TB treatment at cART initiation and for $\geq 14$ days post cART initiation. TB diagnosed by microscopy, culture or clinical algorithm. |
| Boulle 2010 (a,b)        | On TB treatment at cART initiation                                                                                                                 |
| Chu 2011                 | Concurrent active TB diagnosis at cART initiation                                                                                                  |
| Dao 2011                 | Concurrent active TB diagnosis at cART initiation                                                                                                  |
| DeSilva 2009             | Concurrent TB diagnosis and treatment at cART initiation. TB co-infection assessed using patient files and pharmacy records.                       |
| Dronda 2011              | Definite or presumptive diagnosis of TB in 6 months prior to cART initiation                                                                       |
| Greig 2012               | Current TB diagnosis at cART initiation                                                                                                            |
| Gupta 2013               | On TB treatment at cART initiation                                                                                                                 |
| Lartey 2011              | On TB treatment at cART initiation                                                                                                                 |
| Liechty 2007             | Concurrent active TB diagnosis at cART initiation                                                                                                  |
| Makombe 2007 (a,b)       | Concurrent active TB diagnosis at cART initiation                                                                                                  |
| Manosuthi 2010           | Receiving rifampicin for active TB $\geq 1$ month prior to cART enrollment                                                                         |
| Mugusi 2012 (a,b)        | Newly diagnosed at cART enrollment by smear microscopy, histology or clinical criteria                                                             |
| Mutevedzi 2011 (a,b,c,d) | Concurrent TB treatment at cART initiation                                                                                                         |
| Nguyen 2011              | Active TB at cART initiation                                                                                                                       |
| Stringer 2006 (a,b)      | Active TB at cART initiation                                                                                                                       |
| Westreich 2012 (a,b)     | On treatment for pulmonary TB at cART initiation                                                                                                   |
| Zachariah 2006           | On treatment for active TB at cART initiation                                                                                                      |
| Zachariah 2009           | Active TB at cART initiation                                                                                                                       |

Abbreviations: cART, combination antiretroviral therapy; TB, tuberculosis
