# Supplementary material for: The Effect of Tuberculosis Treatment at Combination Antiretroviral Therapy Initiation on Subsequent Mortality: A Systematic Review and Meta-Analysis
Source: PubMed Central journal article supplement (PMC3797056; doi:10.1371/journal.pone.0078073), 2013-10-15
Supplement: pone.0078073.s003.pdf [file pone.0078073.s003.pdf]

**Table S3. Timing of TB treatment in relation to cART initiation, by study**

| <b>Study</b>             | <b>Timing of TB treatment in relation to cART initiation</b>                                                                                                                                                                                                                                                   |
|--------------------------|----------------------------------------------------------------------------------------------------------------------------------------------------------------------------------------------------------------------------------------------------------------------------------------------------------------|
| Bassett 2012             | 144 newly diagnosed by sputum culture at cART enrollment<br>199 previously diagnosed and on TB treatment at cART enrollment                                                                                                                                                                                    |
| Bera 2009                | Not specified                                                                                                                                                                                                                                                                                                  |
| Bhowmik 2012             | Not specified                                                                                                                                                                                                                                                                                                  |
| Boulle 2008 (a)          | Patients only included as prevalent TB in the analysis if they continued TB treatment past 14 days post cART initiation.<br>Duration of TB treatment at cART initiation [median (IQR)]: 87 (60-135) days                                                                                                       |
| Boulle 2008 (b)          | Patients only included as prevalent TB in the analysis if they continued TB treatment past 14 days post cART initiation.<br>Duration of TB treatment at cART initiation [median (IQR)]: 73 (44-115) days                                                                                                       |
| Boulle 2010 (a,b)        | Not specified                                                                                                                                                                                                                                                                                                  |
| Chu 2011                 | Not specified                                                                                                                                                                                                                                                                                                  |
| Dao 2011                 | Not specified                                                                                                                                                                                                                                                                                                  |
| DeSilva 2009             | Not specified                                                                                                                                                                                                                                                                                                  |
| Dronda 2011              | Duration of TB treatment at cART initiation [median (IQR)]: 53 (25.75-83.25) days                                                                                                                                                                                                                              |
| Greig 2012               | Not specified                                                                                                                                                                                                                                                                                                  |
| Gupta 2013               | Not specified                                                                                                                                                                                                                                                                                                  |
| Lartey 2011              | Duration of TB treatment at cART initiation ranged from 4 to 90 days (median: 33)                                                                                                                                                                                                                              |
| Liechty 2007             | Not specified                                                                                                                                                                                                                                                                                                  |
| Makombe 2007 (a,b)       | cART was deferred until the continuation phase of TB treatment (2 months) was complete.                                                                                                                                                                                                                        |
| Manosuthi 2010           | Median (IQR) duration of concurrent administration of nevirapine and rifampin: 5.4 (4.6-6.1) months                                                                                                                                                                                                            |
| Mugusi 2012 (a,b)        | All patients diagnosed with TB started cART after 4 weeks of TB treatment.                                                                                                                                                                                                                                     |
| Mutevedzi 2011 (a,b,c,d) | Not specified                                                                                                                                                                                                                                                                                                  |
| Nguyen 2011              | Not specified                                                                                                                                                                                                                                                                                                  |
| Stringer 2006 (a,b)      | Many patients were taking TB treatment for weeks to months prior to cART initiation.<br>If newly diagnosed with TB during enrollment, they deferred cART until the acute phase of TB treatment was complete, unless CD4 count <50 when cART was started immediately.                                           |
| Westreich 2012 (a,b)     | 254 (21.2%) were on TB treatment for >120 days prior to cART initiation.<br>320 (26.7%) were on TB treatment for 61-120 days prior to cART initiation.<br>289 (24.1%) were on TB treatment for 31-60 days prior to cART initiation.<br>334 (27.9%) were on TB treatment for ≤30 days prior to cART initiation. |
| Zachariah 2006           | Not specified                                                                                                                                                                                                                                                                                                  |
| Zachariah 2009           | Not specified                                                                                                                                                                                                                                                                                                  |

Abbreviations: cART, combination antiretroviral therapy; IQR, interquartile range; TB, tuberculosis
