# Supplementary material for: The Effect of Tuberculosis Treatment at Combination Antiretroviral Therapy Initiation on Subsequent Mortality: A Systematic Review and Meta-Analysis
Source: PubMed Central journal article supplement (PMC3797056; doi:10.1371/journal.pone.0078073), 2013-10-15
Supplement: pone.0078073.s005.pdf [file pone.0078073.s005.pdf]

**Table S5. Meta-regression results for the effect of TB treatment on mortality**

| Length of follow-up time                | Study or Population Characteristic      | Category                  | Number of Studies    | Homogeneity p-value | RR <sub>RE</sub> (95% CI) | Ratio of RRs (95% CI) |                   |
|-----------------------------------------|-----------------------------------------|---------------------------|----------------------|---------------------|---------------------------|-----------------------|-------------------|
| 1-3 months                              | Study design                            | Prospective cohort        | 5                    | 0.13                | 1.11 (0.80, 1.54)         | 1.02 (0.49, 2.13)     |                   |
|                                         |                                         | Retrospective cohort      | 3                    | 0.10                | 1.08 (0.68, 1.71)         | Reference             |                   |
|                                         | Median baseline CD4 count               | <100 cells/ $\mu$ L       | 2                    | 0.08                | 1.97 (0.44, 8.84)         | 1.67 (0.40, 6.98)     |                   |
|                                         |                                         | $\geq$ 100 cells/ $\mu$ L | 5                    | 0.23                | 1.12 (0.89, 1.40)         | Reference             |                   |
|                                         | Ratio measure                           | Hazard ratio              | 4                    | 0.42                | 1.19 (0.98, 1.44)         | 1.34 (0.71, 2.54)     |                   |
|                                         |                                         | Risk ratio or odds ratio  | 4                    | 0.07                | 1.02 (0.56, 1.86)         | Reference             |                   |
|                                         | Adjustment*                             | Adjusted                  | 6                    | 0.08                | 1.17 (0.89, 1.55)         | 1.41 (0.62, 3.22)     |                   |
|                                         |                                         | Unadjusted                | 2                    | 0.80                | 0.82 (0.52, 1.31)         | Reference             |                   |
|                                         | Adjustment for age and sex <sup>†</sup> | Yes                       | 5                    | 0.23                | 1.12 (0.89, 1.40)         | 1.04 (0.43, 2.49)     |                   |
|                                         |                                         | No                        | 3                    | 0.05                | 1.32 (0.51, 3.40)         | Reference             |                   |
|                                         | Adjustment for hemoglobin               | Yes                       | 3                    | 0.13                | 1.56 (0.99, 2.44)         | 1.55 (0.96, 2.49)     |                   |
|                                         |                                         | No                        | 5                    | 0.64                | 0.96 (0.78, 1.18)         | Reference             |                   |
|                                         | 6-12 months                             | Study design              | Prospective cohort   | 7                   | 0.10                      | 1.22 (0.86, 1.74)     | 1.06 (0.63, 1.79) |
|                                         |                                         |                           | Retrospective cohort | 4                   | 0.11                      | 1.10 (0.85, 1.43)     | Reference         |
| Length of follow-up                     |                                         | 6-9 months                | 4                    | 0.14                | 0.93 (0.68, 1.28)         | 0.70 (0.51, 0.96)     |                   |
|                                         |                                         | 11-12 months              | 7                    | 0.61                | 1.29 (1.06, 1.56)         | Reference             |                   |
| Clinical setting                        |                                         | HIV care                  | 7                    | 0.10                | 1.19 (0.95, 1.49)         | 1.21 (0.68, 2.16)     |                   |
|                                         |                                         | Primary care              | 4                    | 0.11                | 1.13 (0.63, 2.03)         | Reference             |                   |
| cART regimen                            |                                         | EFV-based                 | 3                    | 0.62                | 0.86 (0.60, 1.23)         | 0.74 (0.40, 1.37)     |                   |
|                                         |                                         | NVP-based or a mixture    | 8                    | 0.03                | 1.23 (0.96, 1.58)         | Reference             |                   |
| TB is main exposure                     |                                         | Yes                       | 6                    | 0.25                | 0.99 (0.80, 1.23)         | 0.72 (0.44, 1.16)     |                   |
|                                         |                                         | No                        | 5                    | 0.13                | 1.46 (1.00, 2.12)         | Reference             |                   |
| Gender                                  |                                         | Women only                | 2                    | 0.18                | 2.57 (0.83, 7.98)         | 2.08 (0.81, 5.33)     |                   |
|                                         |                                         | Both genders included     | 9                    | 0.16                | 1.08 (0.90, 1.29)         | Reference             |                   |
| Mean patient age                        |                                         | $\leq$ 33 years           | 4                    | 0.06                | 1.21 (0.68, 2.16)         | 0.80 (0.43, 1.48)     |                   |
|                                         |                                         | >33 years                 | 5                    | 0.42                | 1.26 (1.03, 1.54)         | Reference             |                   |
| Median baseline CD4 count               |                                         | <100 cells/ $\mu$ L       | 4                    | 0.17                | 1.12 (0.75, 1.67)         | 0.84 (0.46, 1.52)     |                   |
|                                         |                                         | $\geq$ 100 cells/ $\mu$ L | 6                    | 0.15                | 1.33 (0.97, 1.83)         | Reference             |                   |
| Ratio measure                           |                                         | Hazard ratio              | 6                    | 0.56                | 1.02 (0.84, 1.24)         | 0.79 (0.47, 1.33)     |                   |
|                                         |                                         | Risk ratio                | 5                    | 0.01                | 1.44 (0.91, 2.27)         | Reference             |                   |
| Adjustment <sup>‡</sup>                 |                                         | Adjusted                  | 6                    | 0.73                | 1.00 (0.82, 1.22)         | 0.75 (0.45, 1.26)     |                   |
|                                         |                                         | Unadjusted                | 5                    | 0.01                | 1.47 (0.95, 2.28)         | Reference             |                   |
| Adjustment for age and sex <sup>§</sup> |                                         | Yes                       | 5                    | 0.66                | 0.99 (0.81, 1.21)         | 0.73 (0.44, 1.22)     |                   |
|                                         |                                         | No                        | 6                    | 0.01                | 1.46 (0.97, 2.20)         | Reference             |                   |
| Adjustment for BMI/weight               |                                         | Yes                       | 2                    | 1.00                | 1.05 (0.80, 1.38)         | 0.87 (0.46, 1.68)     |                   |
|                                         |                                         | No                        | 9                    | 0.03                | 1.21 (0.93, 1.59)         | Reference             |                   |
| Adjustment for hemoglobin               |                                         | Yes                       | 2                    | 0.66                | 1.28 (0.74, 2.22)         | 1.11 (0.49, 2.53)     |                   |
|                                         |                                         | No                        | 9                    | 0.03                | 1.15 (0.91, 1.45)         | Reference             |                   |
| 18-98 months                            |                                         | Study design              | Prospective cohort   | 7                   | 0.01                      | 1.14 (0.91, 1.42)     | 0.54 (0.26, 1.13) |
|                                         |                                         |                           | Retrospective cohort | 3                   | <0.01                     | 2.21 (0.89, 5.49)     | Reference         |
|                                         |                                         | Length of follow-up       | 18-36 months         | 3                   | <0.01                     | 1.58 (0.81, 3.10)     | 1.24 (0.56, 2.76) |
|                                         |                                         |                           | 47-98 months         | 7                   | <0.01                     | 1.23 (0.94, 1.62)     | Reference         |
|                                         | Geographic location                     | Africa                    | 5                    | <0.01               | 1.24 (0.84, 1.82)         | 0.80 (0.37, 1.73)     |                   |
|                                         |                                         | Asia or Europe            | 5                    | 0.49                | 1.50 (1.25, 1.81)         | Reference             |                   |

|                                    |                     |   |       |                   |                   |
|------------------------------------|---------------------|---|-------|-------------------|-------------------|
| Clinical setting                   | HIV care            | 8 | <0.01 | 1.54 (1.12, 2.10) | 1.70 (0.77, 3.76) |
|                                    | Primary care        | 2 | 0.02  | 0.91 (0.57, 1.47) | Reference         |
| All patients ART-naïve             | Yes                 | 8 | <0.01 | 1.46 (0.99, 2.15) | 1.30 (0.54, 3.14) |
|                                    | No                  | 2 | 0.75  | 1.12 (0.97, 1.28) | Reference         |
| TB is main exposure                | Yes                 | 5 | 0.20  | 1.30 (1.08, 1.58) | 0.92 (0.42, 2.01) |
|                                    | No                  | 5 | <0.01 | 1.44 (0.85, 2.44) | Reference         |
| Used national death registry       | Yes                 | 2 | 0.03  | 0.90 (0.58, 1.38) | 0.57 (0.26, 1.24) |
|                                    | No                  | 8 | <0.01 | 1.55 (1.14, 2.10) | Reference         |
| Mean patient age                   | ≤33 years           | 2 | 0.01  | 1.33 (0.33, 5.31) | 0.84 (0.28, 2.54) |
|                                    | >33 years           | 7 | <0.01 | 1.41 (1.03, 1.93) | Reference         |
| Median baseline CD4 count          | <100 cells/μL       | 3 | 0.07  | 1.32 (0.92, 1.88) | 1.05 (0.38, 2.94) |
|                                    | ≥100 cells/μL       | 5 | <0.01 | 1.26 (0.76, 2.08) | Reference         |
| Ratio measure                      | Hazard ratio or IRR | 8 | <0.01 | 1.35 (0.99, 1.85) | 1.02 (0.36, 2.90) |
|                                    | Risk ratio          | 2 | 0.88  | 1.38 (1.07, 1.77) | Reference         |
| Adjustment**                       | Adjusted            | 8 | <0.01 | 1.29 (0.99, 1.70) | 0.63 (0.19, 2.12) |
|                                    | Unadjusted          | 2 | 0.30  | 2.13 (0.96, 4.72) | Reference         |
| Adjustment for age                 | Yes                 | 7 | <0.01 | 1.28 (0.93, 1.76) | 0.77 (0.31, 1.92) |
|                                    | No                  | 3 | 0.32  | 1.51 (1.06, 2.14) | Reference         |
| Adjustment for baseline hemoglobin | Yes                 | 2 | 0.67  | 1.07 (0.90, 1.27) | 0.71 (0.30, 1.70) |
|                                    | No                  | 8 | <0.01 | 1.47 (1.04, 2.09) | Reference         |
| Adjustment for BMI/weight          | Yes                 | 4 | 0.11  | 1.01 (0.84, 1.21) | 0.53 (0.31, 0.90) |
|                                    | No                  | 6 | <0.01 | 1.85 (1.25, 2.73) | Reference         |
| Adjustment for baseline CD4 count  | Yes                 | 7 | <0.01 | 1.32 (0.95, 1.85) | 0.88 (0.35, 2.22) |
|                                    | No                  | 3 | 0.16  | 1.44 (0.82, 2.54) | Reference         |

Abbreviations: ART, antiretroviral therapy; BMI, body mass index; cART, combination antiretroviral therapy; CI, confidence interval; EFV, efavirenz; HIV, human immunodeficiency virus; IRR, incidence rate ratio; NVP, nevirapine; RR, relative risk; RRRE, random effects relative risk; TB, tuberculosis

\* All of the adjusted estimates adjusted for baseline CD4 count and BMI or weight

† The 5 estimates that adjusted for age also adjusted for sex

‡ All of the adjusted estimates adjusted for baseline CD4 count

§ The 5 estimates that adjusted for age also adjusted for sex

\*\* All of the adjusted estimates adjusted for sex
