# Supplementary material for: The Effect of Tuberculosis Treatment at Combination Antiretroviral Therapy Initiation on Subsequent Mortality: A Systematic Review and Meta-Analysis
Source: PubMed Central journal article supplement (PMC3797056; doi:10.1371/journal.pone.0078073), 2013-10-15
Supplement: pone.0078073.s007.pdf [file pone.0078073.s007.pdf]

## Document S2. Sensitivity analysis of asymmetrical confidence intervals

We conducted a three-part sensitivity analysis, in each part of which one of the three values would be replaced by a value imputed from the other two, assuming interval symmetry. With  $\ln RR$  as the natural log of the point estimate,  $\ln LO$  as the natural log of the lower limit and  $\ln UP$  as the natural log of the upper limit:

- a. imputed  $\ln RR = 0.5(\ln UP + \ln LO)$
- b. imputed  $\ln LO = \ln RR - (\ln UP - \ln RR) = 2(\ln RR) - \ln UP$
- c. imputed  $\ln UP = \ln RR + (\ln RR - \ln LO) = 2(\ln RR) - \ln LO$

We then re-ran the analysis with each calculated estimate and 95% CI to examine if and how the summarized random effects estimate and 95% CI change, for the appropriate time period.

### Mutevedzi 2011a – 3-month estimate

| Iteration                                               | Calculated estimate (95% CI) | Resulting summary effect estimate (95% CI) |
|---------------------------------------------------------|------------------------------|--------------------------------------------|
| Asymmetrical interval:                                  | 1.59 (0.84, 1.97)            | 1.10 (0.87, 1.40)                          |
| a. imputed $\ln RR = 0.5[\ln(1.97) + \ln(0.84)] = 0.25$ | 1.29 (0.84, 1.97)            | 1.07 (0.87, 1.32)                          |
| b. imputed $\ln LO = 2\ln(1.59) - \ln(1.97) = 0.25$     | 1.59 (1.28, 1.97)            | 1.13 (0.87, 1.47)                          |
| c. imputed $\ln UP = 2\ln(1.59) - \ln(0.84) = 1.10$     | 1.59 (0.84, 3.01)            | 1.07 (0.85, 1.36)                          |

### Boulle 2008b – 6-month estimate

| Iteration                                              | Calculated estimate (95% CI) | Resulting summary effect estimate (95% CI) |
|--------------------------------------------------------|------------------------------|--------------------------------------------|
| Asymmetrical interval:                                 | 0.8 (0.5, 1.1)               | 1.15 (0.94, 1.41)                          |
| a. imputed $\ln RR = 0.5[\ln(1.1) + \ln(0.5)] = -0.30$ | 0.7 (0.5, 1.1)               | 1.14 (0.92, 1.42)                          |
| b. imputed $\ln LO = 2\ln(0.8) - \ln(1.1) = -0.54$     | 0.8 (0.6, 1.1)               | 1.14 (0.93, 1.40)                          |
| c. imputed $\ln UP = 2\ln(0.8) - \ln(0.5) = 0.25$      | 0.8 (0.5, 1.3)               | 1.16 (0.94, 1.42)                          |

Though asymmetry is possibly due to rounding, not error.

### Nguyen 2011 – 60-month estimate

| Iteration                                              | Calculated estimate (95% CI) | Resulting summary effect estimate (95% CI) |
|--------------------------------------------------------|------------------------------|--------------------------------------------|
| Asymmetrical interval:                                 | 2.9 (1.6, 10.5)              | 1.33 (1.02, 1.75)                          |
| a. imputed $\ln RR = 0.5[\ln(10.5) + \ln(1.6)] = 1.41$ | 4.1 (1.6, 10.5)              | 1.37 (1.05, 1.79)                          |
| b. imputed $\ln LO = 2\ln(2.9) - \ln(10.5) = -0.22$    | 2.9 (0.8, 10.5)              | 1.33 (1.02, 1.72)                          |
| c. imputed $\ln UP = 2\ln(2.9) - \ln(1.6) = 1.66$      | 2.9 (1.6, 5.3)               | 1.38 (1.06, 1.80)                          |
